# Supplementary material for: Fast and accurate matching of cellular barcodes across short-reads and long-reads of single-cell RNA-seq experiments
Source: PubMed Central journal article supplement — iScience. 2022 Jun 7;25(7):104530. doi: 10.1016/j.isci.2022.104530 (PMC9209721; doi:10.1016/j.isci.2022.104530), 2022-06-07
Supplement: mmc1.pdf [file mmc1.pdf]

iScience, Volume 25

## **Supplemental information**

### **Fast and accurate matching of cellular barcodes across short-reads and long-reads of single-cell RNA-seq experiments**

**Ghazal Ebrahimi, Baraa Orabi, Meghan Robinson, Cedric Chauve, Ryan  
Flannigan, and Faraz Hach**

## Supplementary Material

Table S1: Statistics comparing the matches of FLAMES and scTagger against the Brute-force method, related to Figure 6.

| Sample | Brute matched? | Brute match unique? | scTagger = Brute? | FLAMES = Brute? | scTagger = FLAMES? | % of LRs | # of LRs  |
|--------|----------------|---------------------|-------------------|-----------------|--------------------|----------|-----------|
| N      | ✓              | ✓                   | ✓                 | ✓               | ✓                  | 23.5%    | 1,734,479 |
|        | ✓              | ✓                   | ✓                 | ✗               | ✗                  | 26.7%    | 1,965,586 |
|        | ✓              | ✓                   | ✗                 | ✓               | ✗                  | 0.1%     | 3,742     |
|        | ✓              | ✓                   | ✗                 | ✗               | ✗                  | 1.5%     | 111,101   |
|        | ✓              | ✗                   | ✓                 | ✗               | ✗                  | 3.2%     | 235,318   |
|        | ✓              | ✗                   | ✗                 | ✗               | ✗                  | 20.6%    | 1,521,474 |
|        | ✗              | ✗                   | ✗                 | ✗               | ✗                  | 24.4%    | 1,799,495 |
| NOA1   | ✓              | ✓                   | ✓                 | ✓               | ✓                  | 28.4%    | 1,606,970 |
|        | ✓              | ✓                   | ✓                 | ✗               | ✗                  | 28.2%    | 1,597,480 |
|        | ✓              | ✓                   | ✗                 | ✓               | ✗                  | 0.0%     | 1,586     |
|        | ✓              | ✓                   | ✗                 | ✗               | ✗                  | 0.7%     | 42,423    |
|        | ✓              | ✗                   | ✓                 | ✗               | ✗                  | 4.0%     | 228,219   |
|        | ✓              | ✗                   | ✗                 | ✗               | ✗                  | 14.2%    | 803,268   |
|        | ✗              | ✗                   | ✗                 | ✗               | ✗                  | 24.5%    | 1,385,299 |
| NOA2   | ✓              | ✓                   | ✓                 | ✓               | ✓                  | 28.0%    | 1,321,345 |
|        | ✓              | ✓                   | ✓                 | ✗               | ✗                  | 28.4%    | 1,337,904 |
|        | ✓              | ✓                   | ✗                 | ✓               | ✗                  | 0.1%     | 4,581     |
|        | ✓              | ✗                   | ✓                 | ✗               | ✗                  | 2.1%     | 99,454    |
|        | ✓              | ✗                   | ✗                 | ✗               | ✗                  | 2.0%     | 93,328    |
|        | ✓              | ✗                   | ✗                 | ✗               | ✗                  | 15.3%    | 720,629   |
|        | ✗              | ✗                   | ✗                 | ✗               | ✗                  | 24.1%    | 1,136,768 |

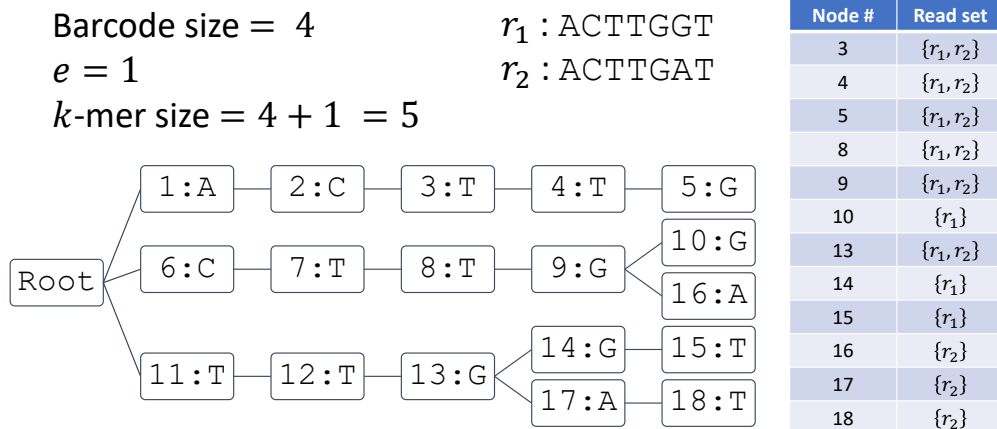

Figure S1: Illustrative example of trie construction in scTagger, related to Figure 2. Assuming barcode size of 4 and maximum allowed error  $e = 1$ , the  $k$ -mer size is 5. The  $k$ -mers of the two LR barcode segments,  $r_1$  and  $r_2$ , are inserted into the trie. The nodes IDs correspond to the order by which they were inserted into the trie. Nodes at layers  $k - e$  to  $k + e =$  (i.e. the deepest three layers in the example) contain nodes that barcode alignment can successfully terminate within the allowed error. A map with these nodes as keys is maintained. Each node maps to a set of LR segments from which we extracted  $k$ -mers that threaded through the node at insertion time.

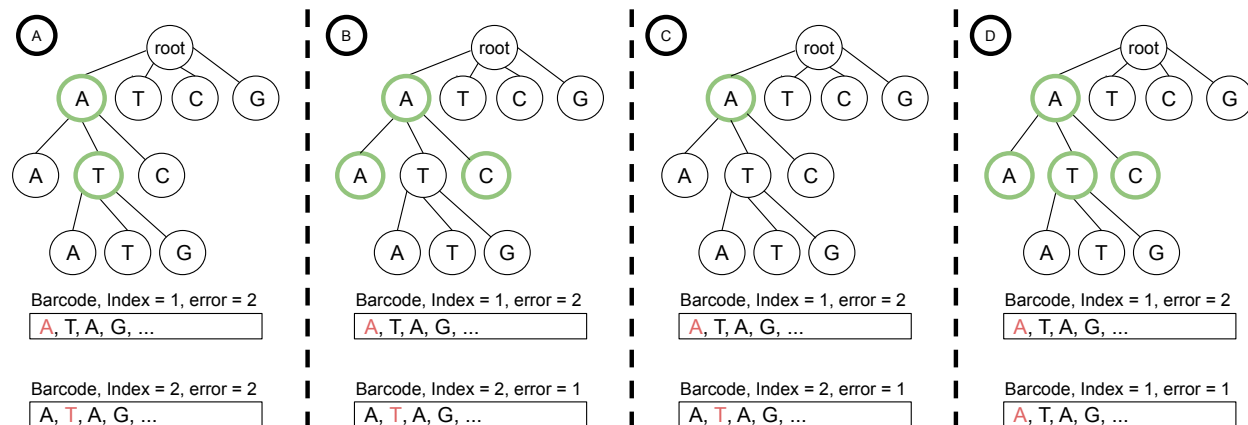

Figure S2: Illustrative example of trie querying, related to Figure 2. The different sub-queries of the search at a given node: A) Matching: If the a child node's character matches the next barcode character, we explore this branch while incrementing the barcode index. B) Mismatch: If the a child node's character does not match the next barcode character, we explore this branch while incrementing the barcode index and the total error incurred. C) Deletion: If a character is deleted from the long-read segment, we skip that corresponding barcode index by incrementing the index while stay on the same node in the trie and increment the total error incurred. D) Insertion: If a character is inserted in the long-read segment, we skip that node and to its children without increasing the barcode index while incrementing the total error incurred.

---

**Algorithm S1** Automatic detection of the ranges of the adapter alignments on the LR<sub>s</sub>, related to Figure 7.

---

```
function GETRANGES(F)           ▷ F[i] is the number adapter alignments on the i-th position
  ranges = list()
  while Q.size > 0 do
    S = sum(F)
    if S < 0.01*T then
      break
    end if
    Q = Queue()
    Q.enqueue(P)
    first = P                       ▷ first location in the range
    last = P                       ▷ last location in the range
    while Q.size > 0 do
      i = Q.dequeue()
      if i ≤ P and F[i-1] > 0.001*T then           ▷ Try expanding range to left
        Q.enqueue(i-1)
        first=i-1
      end if
      if i ≥ P and F[i+1] > 0.001*T then           ▷ Try expanding range to right
        Q.enqueue(i+1)
        last=i+1
      end if
      F[i]=0
    end while
    F[first-20:last+20] = 0           ▷ Set values in range's neighborhood to 0
    ranges.append((first,last))
  end while
  return ranges
end function
```

---

---

**Algorithm S2** Depth-first search in the trie, related to Figure 2.

---

```
function DFS(node, error_budget, index, barcode)
  if index = barcode.length then
    edit_distance = MAX_ALLOWED_ERRORS - error_budget
    output node.LRs,edit_distance
  end if
  if error_budget > 0 then
    DFS(node, error_budget - 1 , index + 1, barcode)           ▷ Deletion
  end if
  for child in node.children do
    if barcode[index] = child.char then
      DFS(child, error_budget, index +1, barcode)             ▷ Match
    end if
    if barcode[index] != child.char then
      DFS(child, error_budget - 1, index +1, barcode)         ▷ Mismatch
    end if
    if error_budget > 0 then
      DFS(child, error_budget - 1, index, barcode)           ▷ Insertion
    end if
  end for
end function
function QUERYTRIE(barcode)
  DFS(root, MAX_ALLOWED_ERRORS, 0, barcode)
end function
```

---
